# Supplementary material for: Chromosome Painting in Cultivated Bananas and Their Wild Relatives (Musa spp.) Reveals Differences in Chromosome Structure
Source: MDPI journal article supplement (doi:10.3390/ijms21217915), 2020-10-24
Supplement: s1 [file s1]

Supplementary Table S1.

|                           | Diploid accessions               |                             |                               |                             |                                       |                              |                              |                 |                       |                      |        |                    | Triploid accessions  |                     |           |             |         |        |                |       |              |          |               |
|---------------------------|----------------------------------|-----------------------------|-------------------------------|-----------------------------|---------------------------------------|------------------------------|------------------------------|-----------------|-----------------------|----------------------|--------|--------------------|----------------------|---------------------|-----------|-------------|---------|--------|----------------|-------|--------------|----------|---------------|
|                           | M. acuminata ssp. (AA)           |                             |                               |                             |                                       |                              |                              |                 | Mchare cultivars (AA) |                      |        | M. balbisiana (BB) |                      | M. schizocarpa (SS) | AAA       |             |         |        | AAB            |       |              | ABB      |               |
|                           |                                  |                             |                               |                             |                                       |                              |                              |                 |                       |                      |        |                    |                      |                     | Cavendish | Gros Michel | EAHB    |        | Plantains      |       |              | Pelipita | Saba          |
| Chromosome change         | <i>malaccensis</i><br>‘Pahang’** | <i>banksii</i><br>‘Banksii’ | <i>microcarpa</i><br>‘Borneo’ | <i>Zebrina</i><br>‘Maia Oa’ | <i>burmannicoides</i><br>‘Calcutta 4’ | <i>burmannica</i><br>‘Tavoy’ | <i>siamea</i><br>‘Pa Rayong’ | <i>P. lilin</i> | Huti White            | Huti (Shumba nyeelu) | Ndyali | Tani**             | Pisang Klutuk Wulung | Schizocarpa*<br>*   | Poyo      | Gros Michel | Imbogo* | Kagera | 3 Hands Planty | Amou* | Obino l’Ewai | Pelipita | Saba sa Hapon |
| 3S/8L + 8S/3L             |                                  |                             |                               | • •                         |                                       | •                            |                              |                 | •                     | •                    | •      |                    |                      |                     | •         | •           | • •     | • •    |                |       |              |          |               |
| 9S/1L + 1L/9S             |                                  |                             |                               |                             | • •                                   | •                            | • •                          |                 |                       |                      |        |                    |                      |                     |           |             |         |        |                |       |              |          |               |
| 8L/2L                     |                                  |                             |                               |                             | • •                                   | •                            | • •                          |                 |                       |                      |        |                    |                      |                     |           |             |         |        |                |       |              |          |               |
| 7S/8S + 7L/8L             |                                  |                             |                               |                             |                                       | •                            |                              |                 |                       |                      |        |                    |                      |                     |           |             |         |        |                |       |              |          |               |
| 3L/4S                     |                                  |                             |                               |                             |                                       |                              | •                            |                 |                       |                      |        |                    |                      |                     |           |             |         |        |                |       |              |          |               |
| 4L/1L + 1L/4L             |                                  |                             |                               |                             |                                       |                              |                              | •               | •                     | •                    | •      |                    |                      |                     | •         | •           |         |        |                |       |              |          |               |
| 7S/1L + telocentric 7L    |                                  |                             |                               |                             |                                       |                              |                              |                 |                       |                      |        |                    |                      |                     | •         | •           |         |        |                |       |              |          |               |
| 1L/3L (B genome specific) |                                  |                             |                               |                             |                                       |                              |                              |                 |                       |                      |        | • •                | • •                  |                     |           |             |         |        | •              | •     | •            | • •      | • •           |
| 7L/1L + missing 7S and 1S |                                  |                             |                               |                             |                                       |                              |                              |                 |                       |                      |        |                    |                      |                     |           |             | •       |        |                |       |              |          |               |
| missing chromosome 2      |                                  |                             |                               |                             |                                       |                              |                              |                 |                       |                      |        |                    |                      |                     |           |             |         |        |                | •     |              |          |               |

\* aneuploid clones

\*\* data from Šimoníková et al. (2019)
